# Supplementary material for: Calcium carbonate microparticles show enhanced anti-cancer properties under the influence of a magnetic field
Source: Royal Society of Chemistry journal article supplement (doi:10.1039/d4nj02757d), 2024-01-01
Supplement: d4nj02757d1.pdf [file d4nj02757d1.pdf]

## Calcium carbonate microparticles show enhanced anti-cancer properties under the influence of magnetic field.

Jinan Parvin V M<sup>1</sup>, Sreya Prasannakumar<sup>1</sup>, Rajyalaxmi Kothuru<sup>1</sup>, Unnikrishnan B S<sup>2</sup>, P.

Gopinath<sup>2</sup>, S Chockalingam<sup>1\*</sup>

<sup>1</sup> Cell Signaling Research Laboratory, Department of Biotechnology, National Institute of Technology Warangal, India.

<sup>2</sup> Department of Biosciences and Bioengineering, Indian Institute of Technology Roorkee, India.

\* Correspondence to: Dr. Chockalingam S, Ph.D., Assistant Professor, Department of Biotechnology, National Institute of Technology Warangal, Warangal- 506004, Telangana State, India.

E-mail: [chocks@nitw.ac.in](mailto:chocks@nitw.ac.in)

### Supplementary information

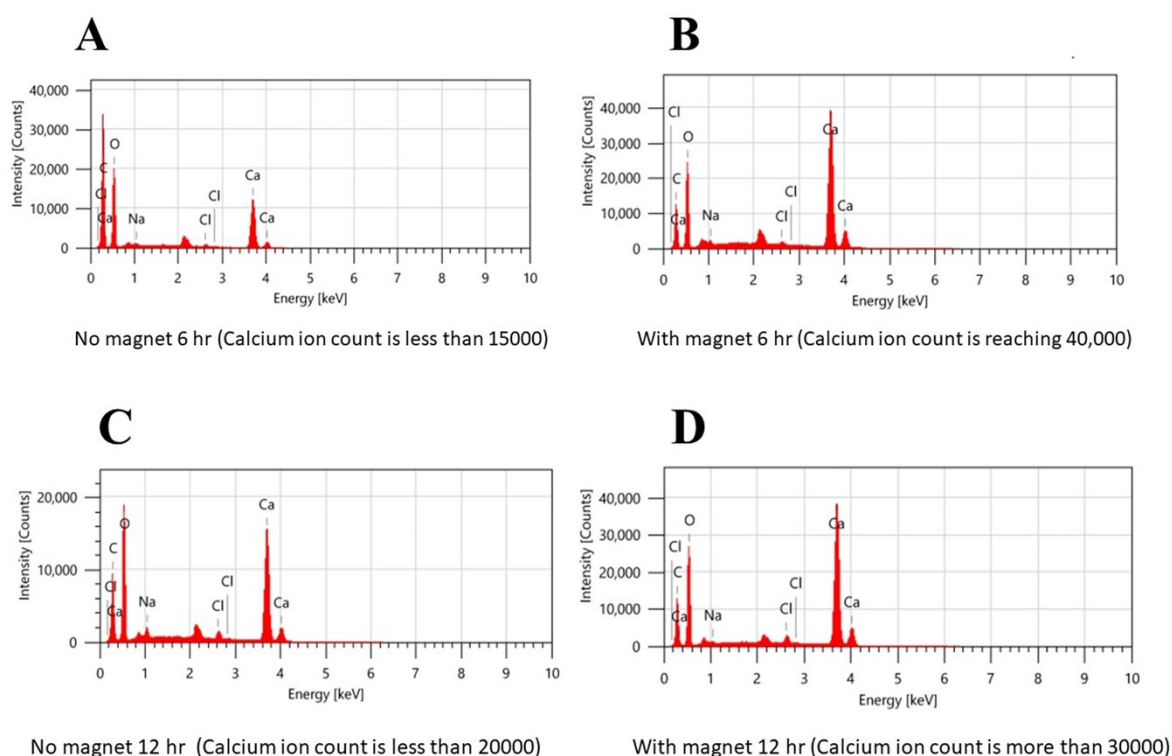

**Supplementary Figure 1.** EDX spectrum of  $\text{CaCO}_3$  microparticles with and without exposure to magnetic field at 6 and 12 hours (A- without magnetic field exposure at 6 h, B- when exposed to magnetic field for 6 h, C- without magnetic field exposure at 12 h, D- when exposed to magnetic field for 12 h)

**Supplementary Table 1:** Elemental analysis of CaCO<sub>3</sub> microparticles with and without exposure to magnetic field at 6 and 12 hours.

**Elements present in CaCO<sub>3</sub> microparticles when exposed to magnetic field for 6 h**

| Element | Line | Mass%                | Atom%      |
|---------|------|----------------------|------------|
| C       | K    | 6.44±0.01            | 13.24±0.02 |
| O       | K    | 31.11±0.07           | 48.01±0.11 |
| Na      | K    | 0.48±0.01            | 0.51±0.01  |
| Cl      | K    | 0.64±0.01            | 0.44±0.01  |
| Ca      | K    | 61.34±0.12           | 37.79±0.07 |
| Total   |      | 100.00               | 100.00     |
| Spc_003 |      | Fitting ratio 0.0249 |            |

**Elements present in CaCO<sub>3</sub> microparticles in the absence of magnetic field at 6 h**

| Element | Line | Mass%                | Atom%      |
|---------|------|----------------------|------------|
| C       | K    | 29.28±0.03           | 43.64±0.05 |
| O       | K    | 36.59±0.09           | 40.95±0.10 |
| Na      | K    | 0.36±0.01            | 0.28±0.01  |
| Cl      | K    | 0.77±0.02            | 0.39±0.01  |
| Ca      | K    | 33.00±0.11           | 14.74±0.05 |
| Total   |      | 100.00               | 100.00     |
| Spc_008 |      | Fitting ratio 0.0211 |            |

**Elements present in CaCO<sub>3</sub> microparticles when exposed to magnetic field for 12 h**

| Element | Line | Mass%                | Atom%      |
|---------|------|----------------------|------------|
| C       | K    | 6.77±0.01            | 13.65±0.03 |
| O       | K    | 32.70±0.07           | 49.53±0.11 |
| Na      | K    | 0.23±0.01            | 0.25±0.01  |
| Cl      | K    | 1.59±0.01            | 1.09±0.01  |
| Ca      | K    | 58.70±0.11           | 35.49±0.07 |
| Total   |      | 100.00               | 100.00     |
| Spc_005 |      | Fitting ratio 0.0149 |            |

**Elements present in CaCO<sub>3</sub> microparticles in the absence of magnetic field at 12 h**

| Element | Line | Mass%                | Atom%      |
|---------|------|----------------------|------------|
| C       | K    | 9.90±0.02            | 17.88±0.04 |
| O       | K    | 40.19±0.10           | 54.51±0.14 |
| Na      | K    | 1.13±0.02            | 1.06±0.02  |
| Cl      | K    | 1.73±0.02            | 1.06±0.01  |
| Ca      | K    | 47.06±0.14           | 25.48±0.08 |
| Total   |      | 100.00               | 100.00     |
| Spc_006 |      | Fitting ratio 0.0218 |            |

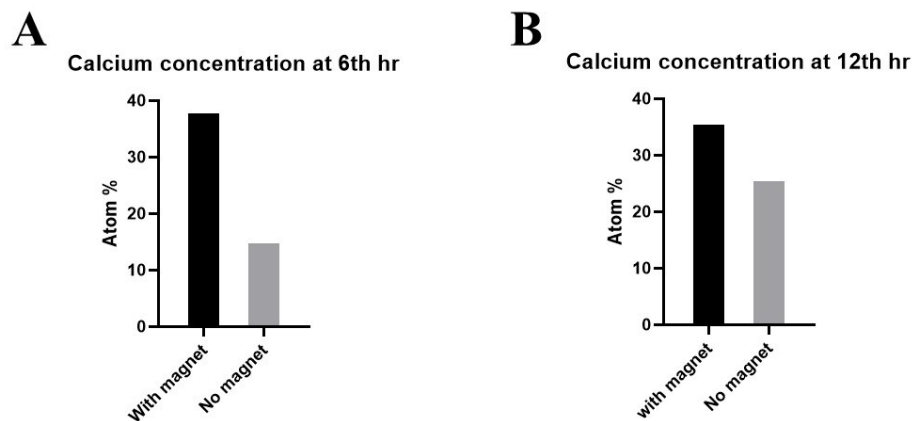

**Supplementary Figure 2.** Atom % of calcium with and without exposure to magnetic field.

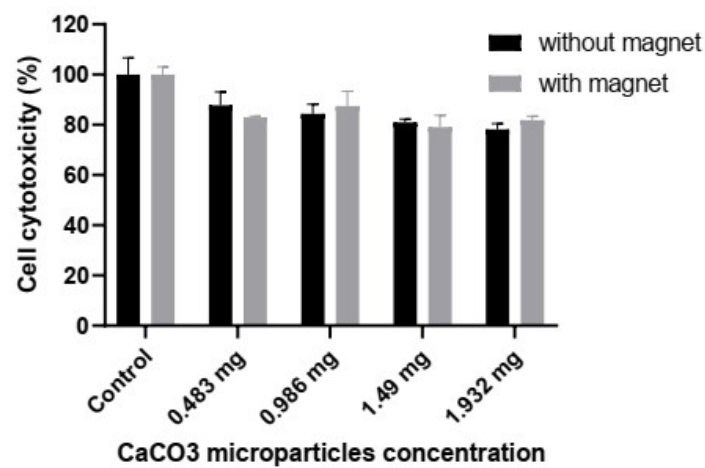

**Supplementary Figure 3.** MTT assay for measuring cytotoxicity of CaCO<sub>3</sub> microparticles after 6 h of exposure to magnetic field.

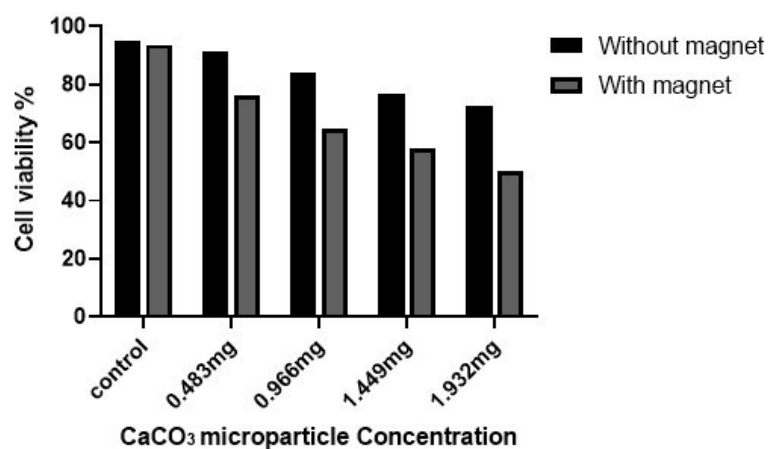

**Supplementary Figure 4:** Cell viability analysis by trypan blue dye exclusion assay (cells treated for 24hr).

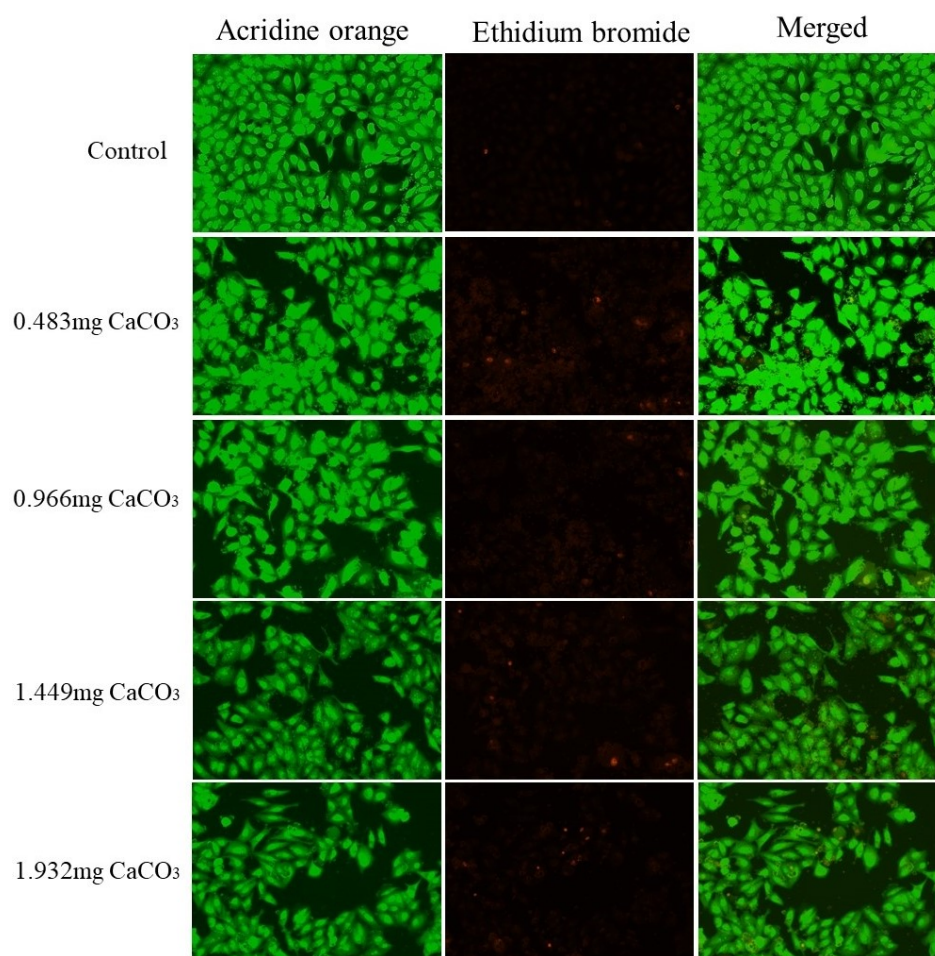

**Supplementary Figure 5.** Acridine Orange/Ethidium Bromide dual staining of HeLa cells treated with various concentrations of calcium carbonate microparticles in the absence of magnetic field.

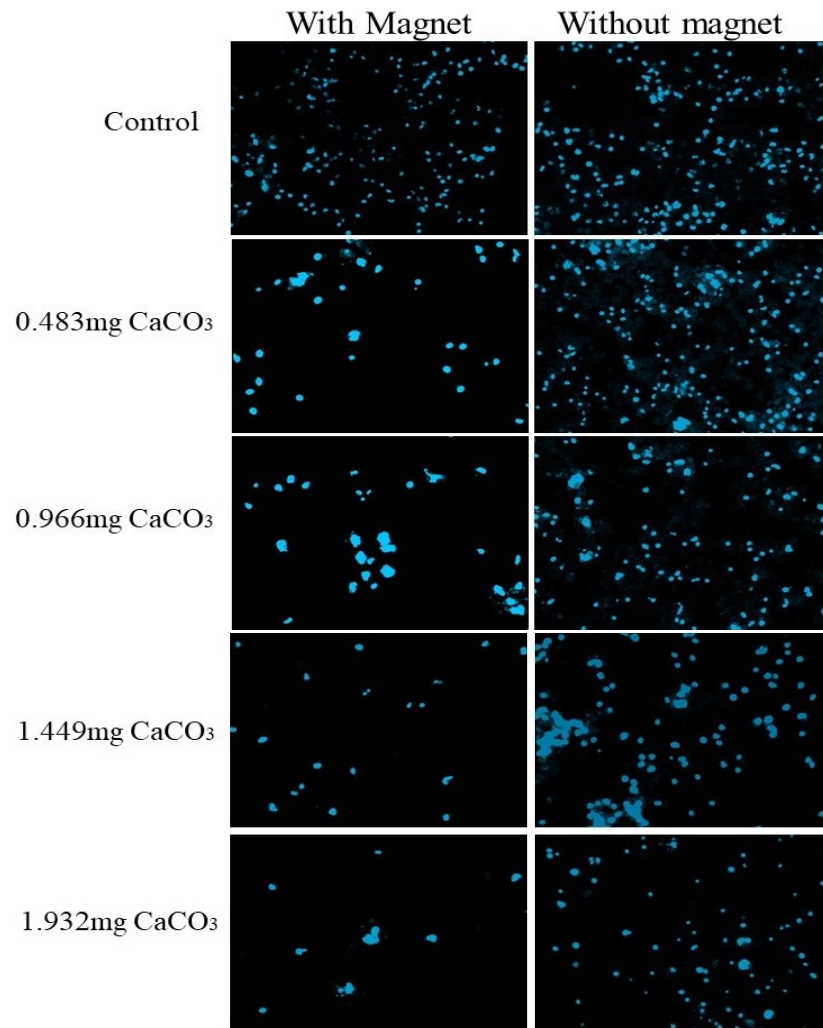

**Supplementary Figure 6.** DAPI staining of HeLa cells treated with different concentration of calcium carbonate microparticles in the presence and absence of magnetic field.
